# Supplementary material
Source: PubMed Central journal article supplement (PMC4164813)

**A**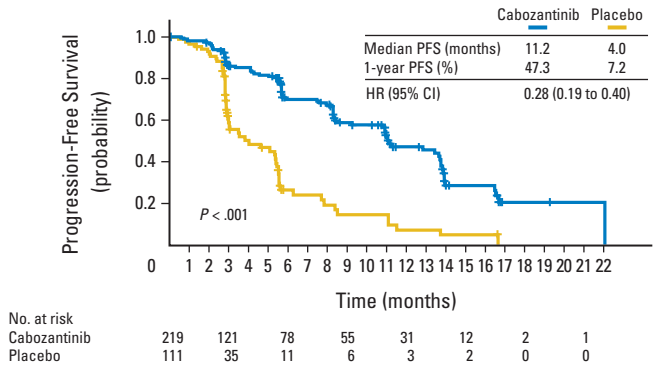**B**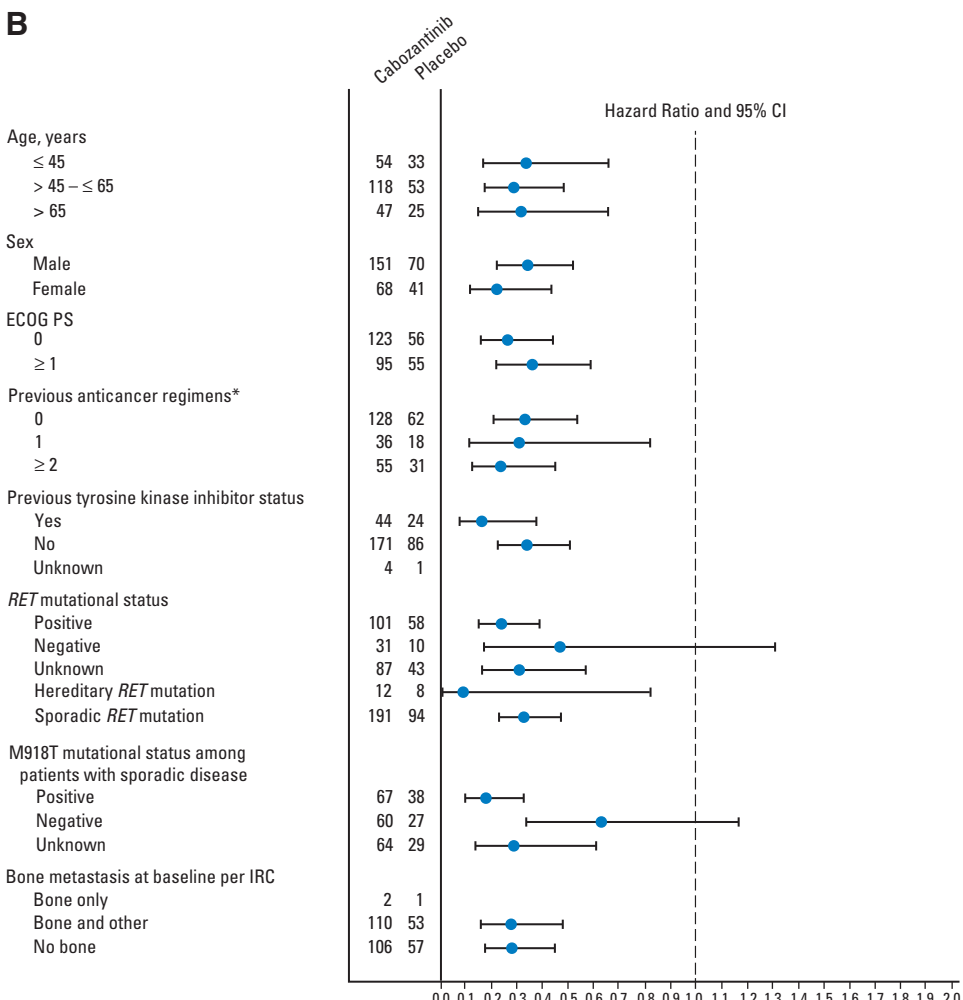

Supplement: supp_JCO.2012.48.4659_84659_Fig_2_FINAL_rev1.pdf [file supp_JCO.2012.48.4659_84659_Fig_2_FINAL_rev1.pdf]
